# Supplementary material for: Structure of the molecular bushing of the bacterial flagellar motor
Source: PubMed Central journal article supplement (PMC8298488; doi:10.1038/s41467-021-24715-3), 2021-07-22
Supplement: 41467_2021_24715_MOESM3_ESM.pdf [file 41467_2021_24715_MOESM3_ESM.pdf]

## Description of Additional Supplementary Files

File Name: Supplementary Movie 1

Description: **Structure of Salmonella flagellar LP ring and its component proteins FliH and FliI.** The 3D density map of the LP ring obtained by cryoEM image analysis and atomic models of its component proteins FliH and FliI in C $\alpha$  ribbon representation colored in rainbow according to their sequences.
